# Supplementary material for: Challenging cases during clinical clerkships beyond the domain of the “medical expert”: an analysis of students' case vignettes
Source: PubMed Central journal article supplement (PMC6545608; doi:10.3205/zma001238), 2019-05-16
Supplement: JME-36-3-30-s-002.pdf [file JME-36-3-30-s-002.pdf]

|                                            |  |                                                                                                                                                                            |              |                  |
|--------------------------------------------|--|----------------------------------------------------------------------------------------------------------------------------------------------------------------------------|--------------|------------------|
| Assessment matrix: difficult clinical case |  |                                                                                                                                                                            | Case No.     |                  |
| Age                                        |  | Department                                                                                                                                                                 |              |                  |
| Sex                                        |  | Disease                                                                                                                                                                    |              |                  |
|                                            |  | Theme                                                                                                                                                                      |              |                  |
|                                            |  | (E.g.: end-of-life; breaking bad news; team-conflict; hierarchy-conflict; pat-autonomy; deportation; treatment of relatives; clinical decision dilemma; legal uncertainty) |              |                  |
|                                            |  | Problem of Migration?                                                                                                                                                      |              | Palliative Care? |
| CanMEDS-Role 1                             |  | Professional                                                                                                                                                               | Communicator |                  |
| Role 2                                     |  | Scholar                                                                                                                                                                    | Collaborator |                  |
| Role 3                                     |  | Health Advocate                                                                                                                                                            | Manager      |                  |
| pro / com / coll / man / HA / scho / medEx |  | Medical Expert                                                                                                                                                             |              |                  |
