# Supplementary material for: Challenging cases during clinical clerkships beyond the domain of the “medical expert”: an analysis of students' case vignettes
Source: PubMed Central journal article supplement (PMC6545608; doi:10.3205/zma001238), 2019-05-16

Relative frequencies of CanMEDS roles

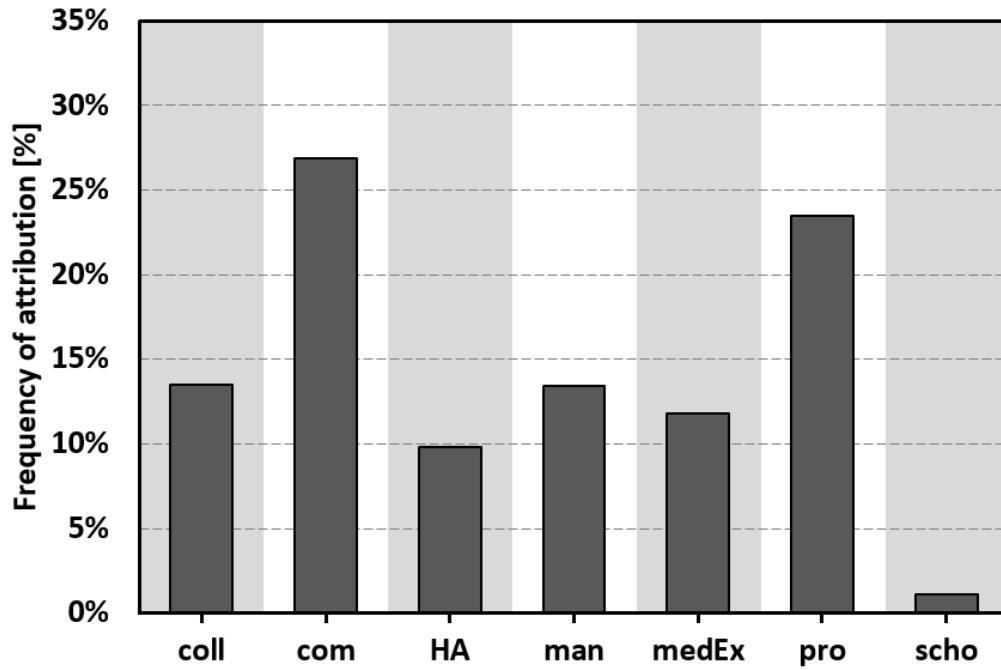

Relative frequencies of CanMEDS roles with first priority

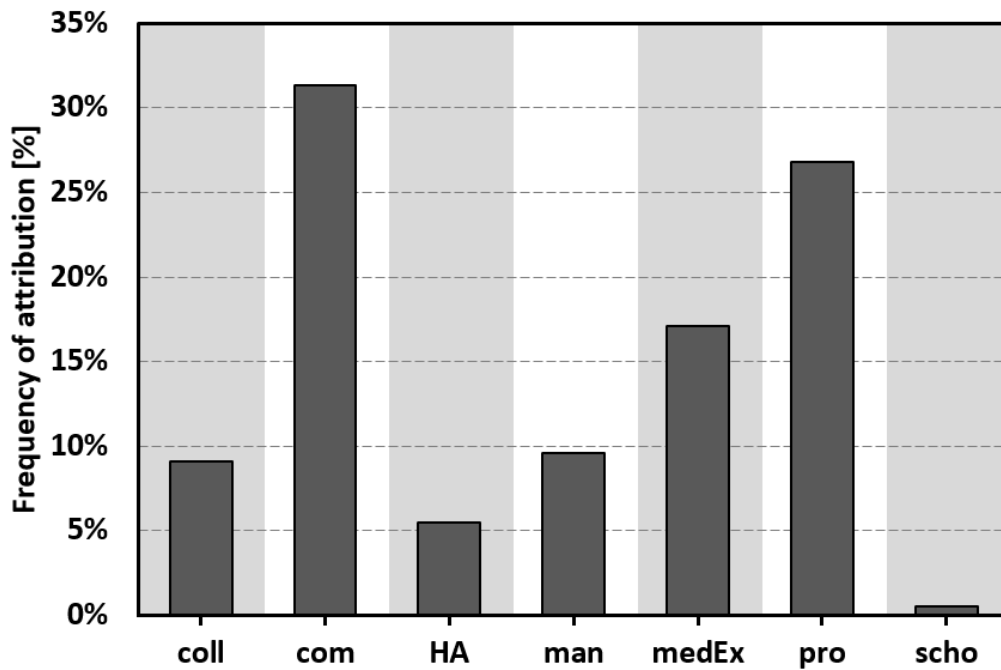

Supplement: JME-36-3-30-s-004.pdf [file JME-36-3-30-s-004.pdf]
