# Supplementary material for: Challenging cases during clinical clerkships beyond the domain of the “medical expert”: an analysis of students' case vignettes
Source: PubMed Central journal article supplement (PMC6545608; doi:10.3205/zma001238), 2019-05-16
Supplement: JME-36-3-30-s-005.pdf [file JME-36-3-30-s-005.pdf]

| Combinations of roles |                 |                 | Frequency (n) |
|-----------------------|-----------------|-----------------|---------------|
| Communicator          | Professional    | Manager         | 68            |
| Communicator          | Professional    | Health Advocate | 67            |
| Communicator          | Professional    | Collaborator    | 61            |
| Communicator          | Manager         | Collaborator    | 54            |
| Professional          | Manager         | Collaborator    | 48            |
| Professional          | Manager         | Health Advocate | 32            |
| Communicator          | Manager         | Health Advocate | 27            |
| Communicator          | Health Advocate | Medical Expert  | 26            |
| Communicator          | Professional    | Medical Expert  | 24            |
| Professional          | Health Advocate | Scholar         | 22            |

(n=sum of the combinations chosen by the raters, Most frequently assigned roles highlighted grey)
